# Supplementary material for: The disappearing additive: introducing volatile ethyl acetate into a perovskite precursor for fabricating high efficiency stable devices in open air
Source: Royal Society of Chemistry journal article supplement (doi:10.1039/d1nr08483f), 2022-01-01
Supplement: d1nr08483f1.pdf [file d1nr08483f1.pdf]

## Supplementary Information

Disappeared additive: Introducing volatile ethyl acetate into perovskite precursor for fabricating high efficiency and stable device in open air

*Pengyun Zhang<sup>a</sup>, Ningxia Gu<sup>a</sup>, Lixin Song<sup>a\*</sup>, Xiang Chen<sup>a</sup>, Pingfan Du<sup>a</sup>, Leying Zha<sup>a</sup>, Wei-Hsiang Chen<sup>b</sup>, Jie Xiong<sup>a\*</sup>*

<sup>a</sup> College of Textile Science and Engineering, Zhejiang Sci-Tech University, Hangzhou, 310018, China

<sup>b</sup> School of Science, Huzhou University, Huzhou, 313000, Zhejiang, China

\* **Corresponding Authors:** [lsxong12@zstu.edu.cn](mailto:lsxong12@zstu.edu.cn) (LX Song); [jxiong@zstu.edu.cn](mailto:jxiong@zstu.edu.cn) (J Xiong).

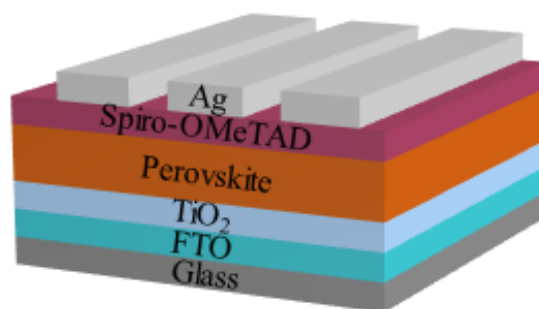

**Fig. S1.** The complete structure of device is FTO-etched glass/TiO<sub>2</sub>/CH<sub>3</sub>NH<sub>3</sub>PbI<sub>3</sub> (with or without EA)/Spiro-OMeTAD/Ag.

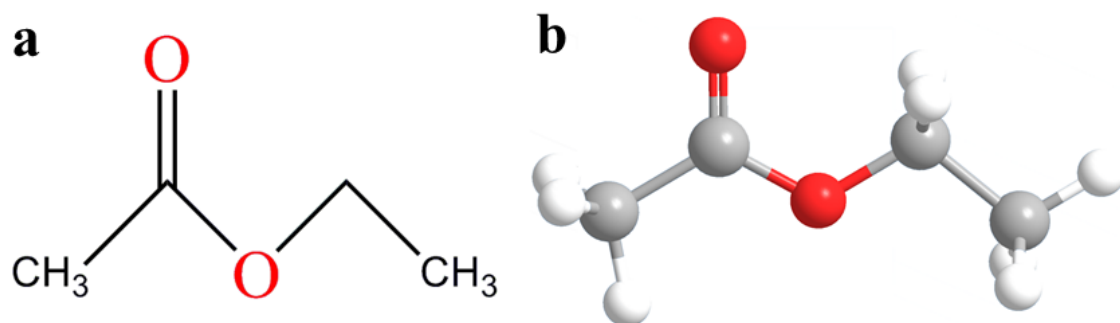

**Fig. S2.** The chemical structure (a) and the corresponding 3D model (b) of Ethyl Acetate (EA).

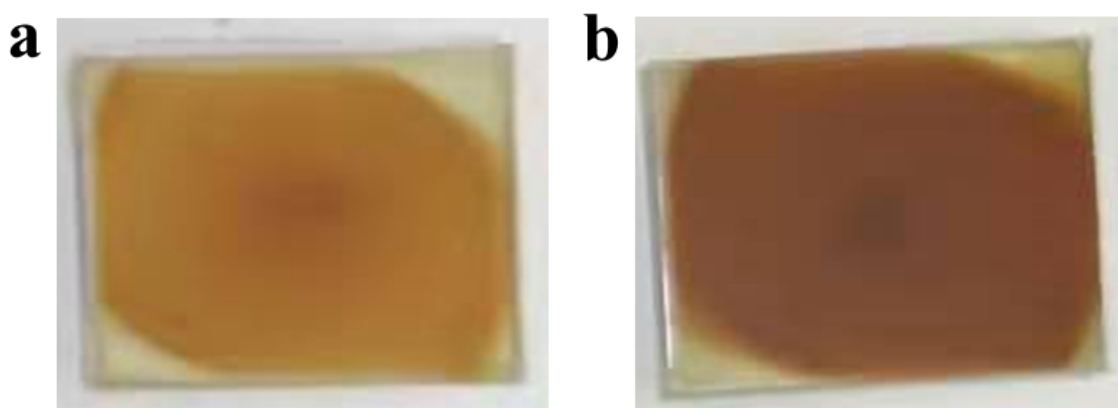

**Fig. S3.** The optical images of both perovskite films (a) without and (b) with EA additive. These samples just went through the spin-coating step (before annealing).

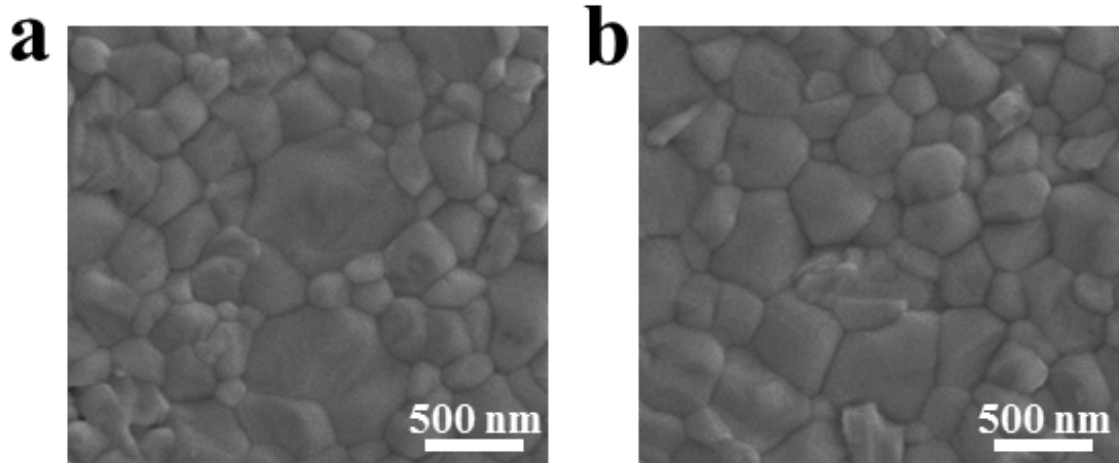

**Fig. S4.** (a and b) Top-view SEM images of perovskite films doping with different concentration (1 vol% and 10 vol%) of EA.

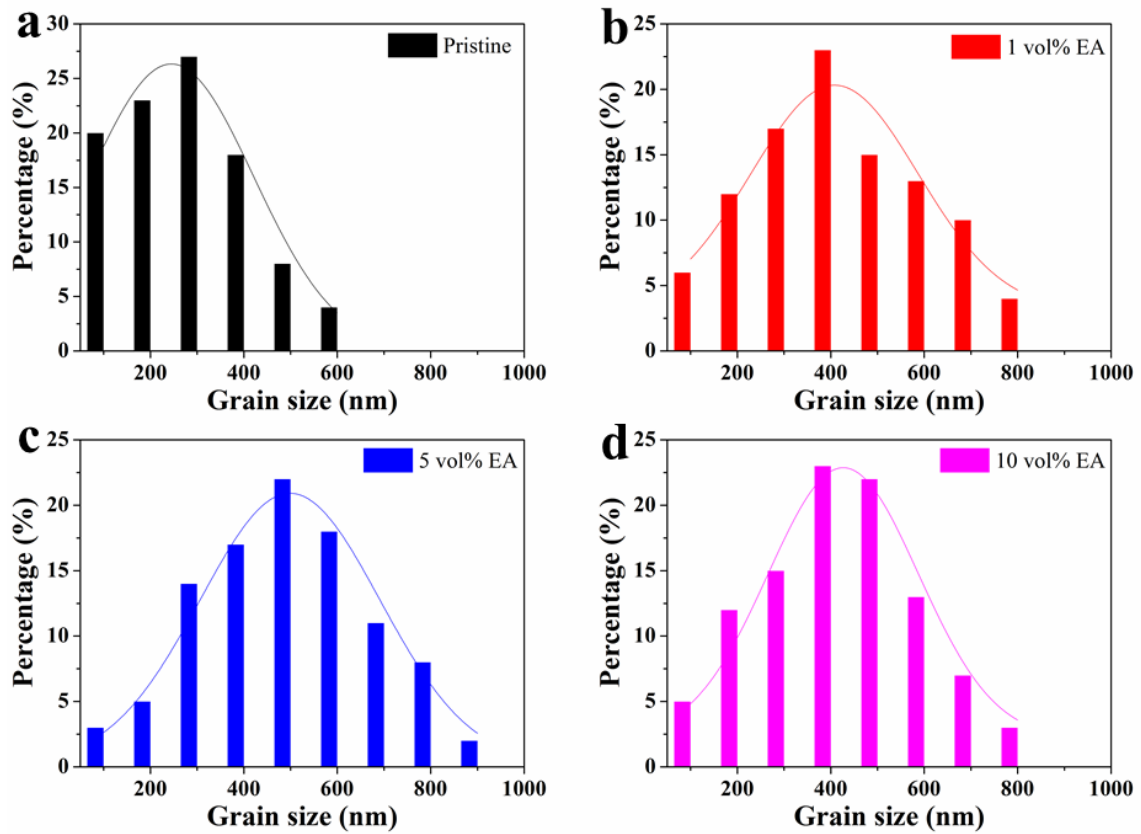

**Fig. S5.** The grain size distribution histogram of perovskite films with different EA concentration.

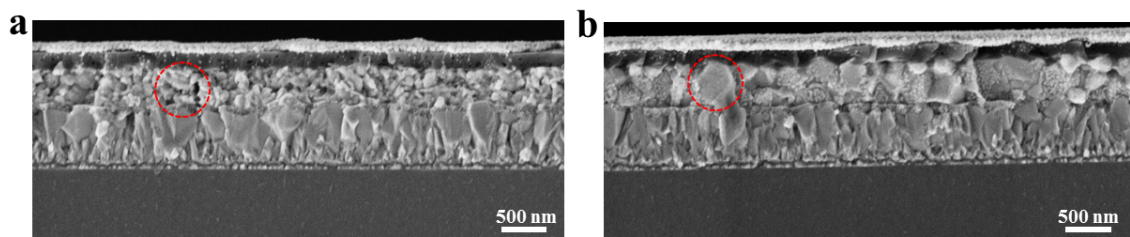

**Fig. S6.** Cross-sectional SEM images of PSCs with (a) pristine and (b) EA-modified perovskite film. The complete structure of device is FTO-etched glass/TiO<sub>2</sub>/CH<sub>3</sub>NH<sub>3</sub>PbI<sub>3</sub> (with or without EA)/Spiro-OMeTAD/Ag.

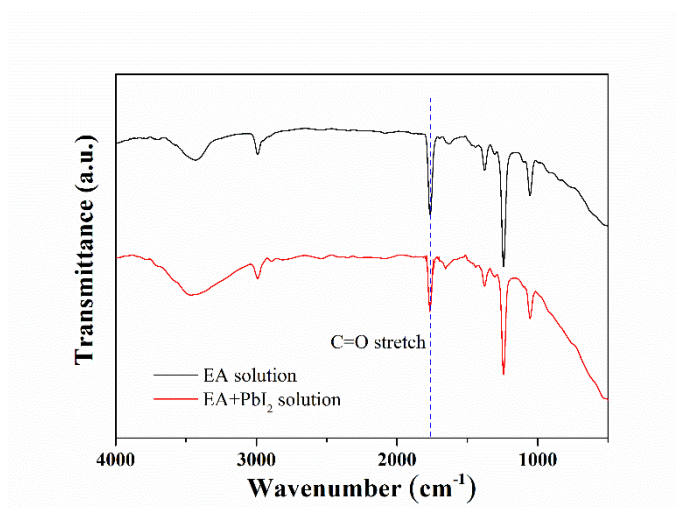

**Fig. S7.** The FTIR spectra of EA and EA+PbI<sub>2</sub> solution.

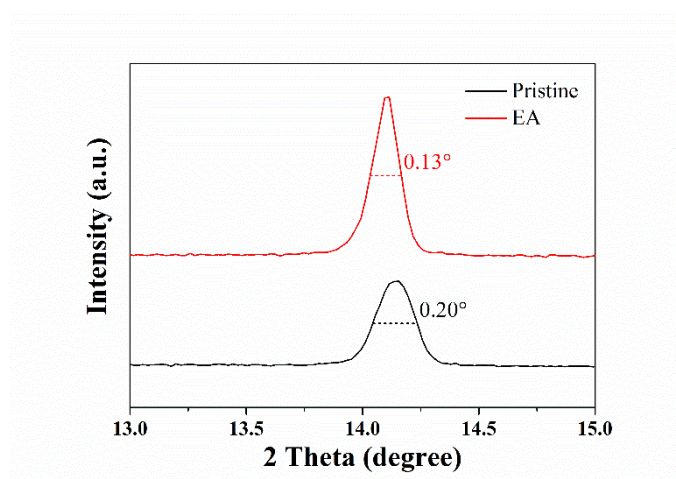

**Fig. S8.** The higher magnification patterns of XRD analysis around the (110) crystal plane.

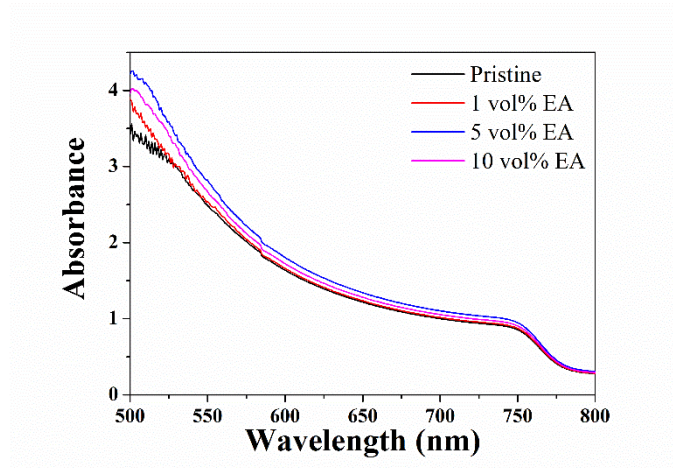

**Fig. S9.** The UV-Vis absorbance spectra of perovskite films which added different concentration (0 vol%, 1 vol%, 5 vol% and 10 vol%) of EA.

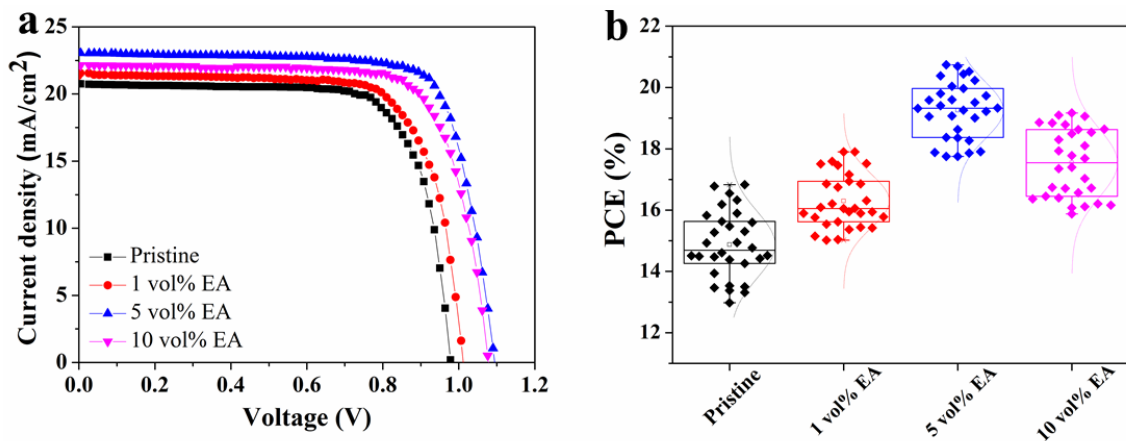

**Fig. S10.** (a) The J-V curves of PSCs based on different concentration of EA. (b) Thirty individual cells' PCE of all kind PSCs based on different concentration of EA.

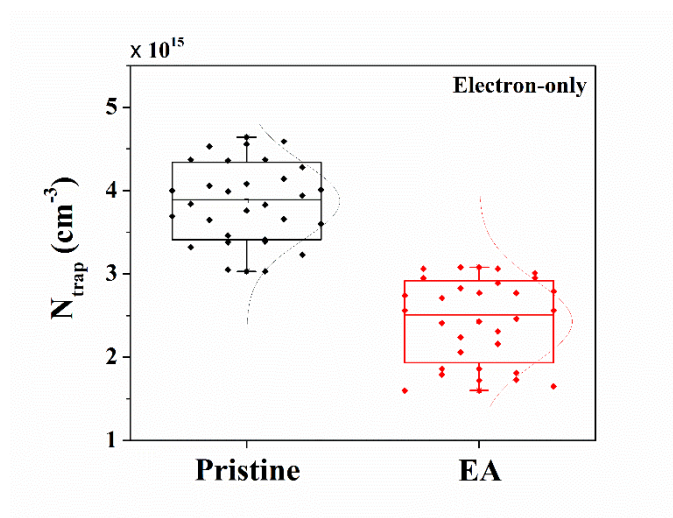

**Fig. S11.** The statistical collection of data on 30 sets samples of electron-only devices.

**Table S1.** Detailed photovoltaic parameters of PSCs with different concentrations of EA.

| Samples    | $J_{sc}$ (mA/cm <sup>2</sup> ) | $V_{oc}$ (V) | FF (%) | PCE (%) |
|------------|--------------------------------|--------------|--------|---------|
| Pristine   | 20.74                          | 0.98         | 74.68  | 15.18   |
| 1 vol% EA  | 21.55                          | 1.01         | 73.60  | 16.02   |
| 5 vol% EA  | 23.05                          | 1.10         | 77.01  | 19.53   |
| 10 vol% EA | 22.14                          | 1.08         | 75.28  | 18.00   |
